# Supplementary material for: Cytomegalovirus-based vaccine expressing Ebola virus glycoprotein protects nonhuman primates from Ebola virus infection
Source: PubMed Central journal article supplement (PMC4753684; doi:10.1038/srep21674), 2016-02-15

Cytomegalovirus-based vaccine expressing Ebola virus glycoprotein protects nonhuman primates from Ebola virus infection

Andrea Marzi<sup>1,\*</sup>, Aisling A. Murphy<sup>2,\*</sup>, Friederike Feldmann<sup>3</sup>, Christopher J. Parkins<sup>4</sup>, Elaine Haddock<sup>1</sup>, Patrick W. Hanley<sup>3</sup>, Matthew J. Emery<sup>5</sup>, Flora Engelmann<sup>6</sup>, Ilhem Messaoudi<sup>6</sup>, Heinz Feldmann<sup>1,†</sup> & Michael A. Jarvis<sup>2,†,§</sup>

<sup>1</sup>Laboratory of Virology, Division of Intramural Research, and <sup>3</sup>Rocky Mountain Veterinary Branch, National Institute of Allergy and Infectious Diseases, National Institutes of Health, Hamilton, Montana, United States of America. <sup>2</sup>School of Biomedical and Healthcare Sciences, and <sup>5</sup>School of Biological Sciences, University of Plymouth, Devon, United Kingdom. <sup>4</sup>Vaccine and Gene Therapy Institute, Oregon Health & Sciences University, Portland, Oregon, United States of America. <sup>6</sup>School of Medicine, University of California, Riverside, California, United States of America.

<sup>\*,†</sup>These authors contributed equally to this work.

<sup>§</sup>Correspondence should be addressed to M.A.J. ([michael.jarvis@plymouth.ac.uk](mailto:michael.jarvis@plymouth.ac.uk))

**Supplementary Figure 1.** Flow cytometry showing original dot-plot data presented from day -21 (1 week post-boost).

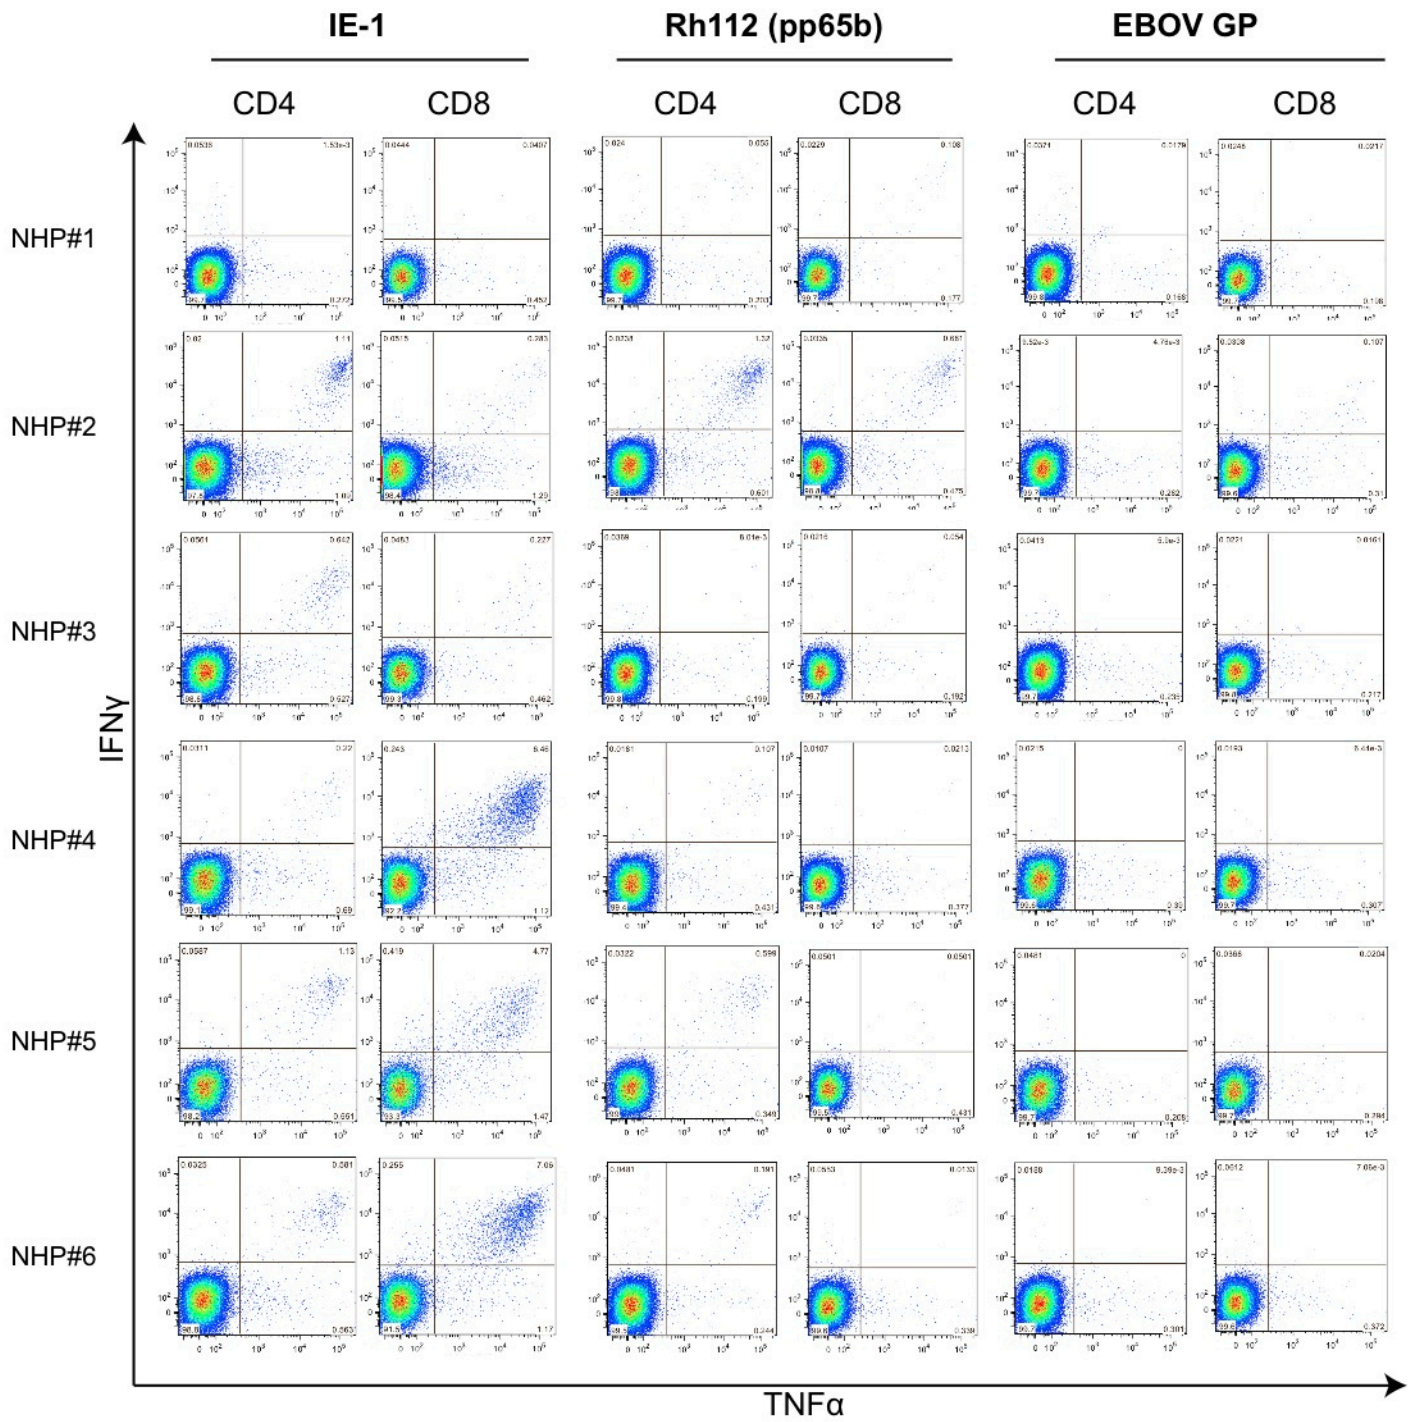

Supplement: srep21674-s1.pdf [file srep21674-s1.pdf]
